# Supplementary material
Source: Springer Nature journal article supplement (https://www.springermedizin.de/resource/supplementary/13030_2010_65_MOESM3_ESM.pdf/9644704)

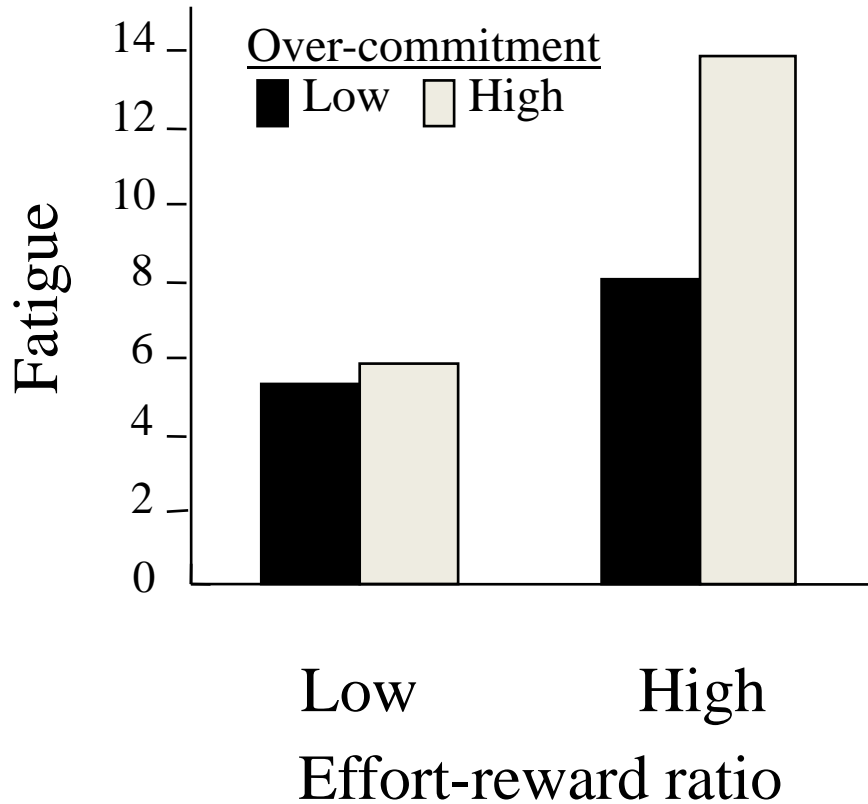

Supplement: MOESM3 [file 9644704]
